# Supplementary material for: Assessment of Sensory Impairment and Health Care Satisfaction Among Medicare Beneficiaries
Source: PubMed Central journal article supplement (PMC7666423; doi:10.1001/jamanetworkopen.2020.25522), 2020-11-13
Supplement: jamanetwopen-e2025522-s001.pdf [file jamanetwopen-e2025522-s001.pdf]

## Supplemental Online Content

Assi L, Shakarchi AF, Sheehan OC, Deal JA, Swenor BK, Reed NS. Assessment of sensory impairment and health care satisfaction among Medicare beneficiaries. *JAMA Netw Open*. 2020;3(11):e2025522. doi:10.1001/jamanetworkopen.2020.25522

**eTable.** Multivariable-Adjusted Odds Ratios and 95% Confidence Intervals of Dissatisfaction with Different Aspects of Care by Sensory Impairment Status Among Medicare Beneficiaries 65 Years and Older, the Medicare Current Beneficiary Survey (2017)

This supplemental material has been provided by the authors to give readers additional information about their work.

**eTable. Multivariable-Adjusted Odds Ratios and 95% Confidence Intervals of Dissatisfaction with Different Aspects of Care by Sensory Impairment Status Among Medicare Beneficiaries 65 Years and Older, the Medicare Current Beneficiary Survey (2017)**

|                                                                                                         | All Medicare Beneficiaries (N=10,783) |                | Only Medicare Beneficiaries 65 Years and Older (N=8,944) |                |
|---------------------------------------------------------------------------------------------------------|---------------------------------------|----------------|----------------------------------------------------------|----------------|
|                                                                                                         | AOR (95% CI)                          | <i>P</i> value | AOR (95% CI)                                             | <i>P</i> value |
| <b>Dissatisfaction with the overall quality of medical care received</b>                                |                                       |                |                                                          |                |
| None                                                                                                    | Reference                             |                | Reference                                                |                |
| HI only                                                                                                 | 1.31 (0.88, 1.95)                     | 0.19           | 1.18 (0.79, 1.76)                                        | 0.43           |
| VI only                                                                                                 | 1.17 (0.79, 1.74)                     | 0.43           | 1.27 (0.76, 2.11)                                        | 0.37           |
| DSI                                                                                                     | 1.52 (1.10, 2.10)                     | 0.01           | 1.67 (1.14, 2.44)                                        | 0.01           |
| <b>Dissatisfaction with the information given about what was wrong</b>                                  |                                       |                |                                                          |                |
| None                                                                                                    | Reference                             |                | Reference                                                |                |
| HI only                                                                                                 | 1.67 (1.29, 2.17)                     | <0.001         | 1.72 (1.27, 2.32)                                        | <0.001         |
| VI only                                                                                                 | 1.56 (1.18, 2.08)                     | 0.003          | 1.81 (1.23, 2.66)                                        | 0.004          |
| DSI                                                                                                     | 1.82 (1.40, 2.37)                     | <0.001         | 2.04 (1.47, 2.83)                                        | <0.001         |
| <b>Dissatisfaction with doctors' concern with overall health rather than isolated symptoms/diseases</b> |                                       |                |                                                          |                |
| None                                                                                                    | Reference                             |                | Reference                                                |                |
| HI only                                                                                                 | 1.38 (1.03, 1.86)                     | 0.04           | 1.34 (0.97, 1.87)                                        | 0.08           |
| VI only                                                                                                 | 1.29 (0.93, 1.80)                     | 0.13           | 1.29 (0.85, 1.98)                                        | 0.23           |
| DSI                                                                                                     | 2.03 (1.55, 2.66)                     | <0.001         | 1.89 (1.40, 2.55)                                        | <0.001         |
| <b>Dissatisfaction with the ease to get to a doctor from home</b>                                       |                                       |                |                                                          |                |
| None                                                                                                    | Reference                             |                | Reference                                                |                |
| HI only                                                                                                 | 1.01 (0.68, 1.50)                     | 0.97           | 0.96 (0.63, 1.47)                                        | 0.85           |
| VI only                                                                                                 | 1.63 (1.14, 2.31)                     | 0.008          | 1.19 (0.73, 1.94)                                        | 0.48           |
| DSI                                                                                                     | 1.69 (1.24, 2.30)                     | 0.002          | 1.71 (1.24, 2.36)                                        | 0.002          |
| <b>Dissatisfaction with the out-of-pocket costs paid for health care paid</b>                           |                                       |                |                                                          |                |
| None                                                                                                    | Reference                             |                | Reference                                                |                |
| HI only                                                                                                 | 0.98 (0.80, 1.20)                     | 0.86           | 0.92 (0.73, 1.16)                                        | 0.49           |
| VI only                                                                                                 | 1.31 (1.07, 1.61)                     | 0.01           | 1.26 (0.96, 1.64)                                        | 0.10           |
| DSI                                                                                                     | 1.27 (1.04, 1.54)                     | 0.02           | 1.30 (1.04, 1.62)                                        | 0.02           |

Abbreviations: AOR, adjusted odds ratio; CI, confidence interval; HI, hearing impairment; VI, vision impairment; DSI, dual sensory impairment.

All models adjusted for age, sex, race/ethnicity, education, marital status, metropolitan area status, income poverty ratio Medicare threshold, supplemental health insurance, number of chronic conditions, number of functional limitations.
